# Supplementary material for: Division of Labor Between Two Actin Nucleators—the Formin FH1 and the ARP2/3 Complex—in Arabidopsis Epidermal Cell Morphogenesis
Source: PubMed Central journal article supplement (PMC7061858; doi:10.3389/fpls.2020.00148), 2020-03-02
Supplement: DataSheet_1.pdf [file DataSheet_1.pdf]

**Supplementary Table S1.** Primers used in this study (sequences in 5' to 3' orientation).

| <b>Primer name</b> | <b>Sequence</b>                                 | <b>Purpose</b>                                |
|--------------------|-------------------------------------------------|-----------------------------------------------|
| DT1-BsF_FH1g4      | ATATATGGTCTCGATTGACACGG<br>CGGCTACTGTCGGGTT     | Amplifying gRNA template (with DT2-BsR_FH1g7) |
| DT1-F0_FH1g4       | TGACACGGCGGCTACTGTCGGGT<br>TTTAGAGCTAGAAATAGC   | Amplifying gRNA template (with DT2-R0_FH1g7)  |
| DT2-R0_FH1g7       | AACACACGACGCAATGCGGAGGC<br>AATCTCTTAGTCGACTCTAC | Amplifying gRNA template (with DT1-F0_FH1g4)  |
| DT2-BsR_FH1g7      | ATTATTGGTCTCGAAACACACGA<br>CGCAATGCGGAGGCAA     | Amplifying gRNA template (with DT1-BsF_FH1g4) |
| R_FH1_g4g7seq1     | AGATAACCGGCGGTTTTGGT                            | Sequencing <i>fh1</i> :CRISPR mutation        |
