# Supplementary material for: Division of Labor Between Two Actin Nucleators—the Formin FH1 and the ARP2/3 Complex—in Arabidopsis Epidermal Cell Morphogenesis
Source: PubMed Central journal article supplement (PMC7061858; doi:10.3389/fpls.2020.00148), 2020-03-02
Supplement: DataSheet_2.pdf [file DataSheet_2.pdf]

**Supplementary Figure S2.** Sequence comparison between the 5' end of the *FH1* and *fh1-CRISPR* alleles. Predicted protein sequence is shown in bold, the single base insertion in *fh1-CRISPR* is highlighted in yellow.

|                          |     |                                                                        |     |     |     |     |
|--------------------------|-----|------------------------------------------------------------------------|-----|-----|-----|-----|
|                          | 1   | 10                                                                     | 20  | 30  | 40  | 50  |
| <b><i>FH1</i></b>        | 1   | AAAGAAGAAGATAACACA <u>ATG</u> GCTCTTCTTCTTATTCTTCTTCTACTTACTCTTATCTTCA |     |     |     |     |
| <b><i>fh1:CRISPR</i></b> | 1   | .....                                                                  |     |     |     |     |
| <b>FH1</b>               | 1   | <b>M L F F L F F F Y L L L S S</b>                                     |     |     |     |     |
| <b>fh1:CRISPR</b>        | 1   | . . . . .                                                              |     |     |     |     |
|                          | 61  | 70                                                                     | 80  | 90  | 100 | 110 |
| <b><i>FH1</i></b>        | 61  | TCCTCCGATCTAGTCTTCGCCGACCGTCGTGTACTCCACGAACCATTCTTCCCTATAGAT           |     |     |     |     |
| <b><i>fh1:CRISPR</i></b> | 61  | .....                                                                  |     |     |     |     |
| <b>FH1</b>               | 21  | <b>S S D L V F A D R R V L H E P F F P I D</b>                         |     |     |     |     |
| <b>fh1:CRISPR</b>        | 21  | . . . . .                                                              |     |     |     |     |
|                          | 121 | 130                                                                    | 140 | 150 | 160 | 170 |
| <b><i>FH1</i></b>        | 121 | TCACCACCACCGTCCACCACCATCACCACCACCACTTCCTAAACTACCATTCTCTTCAACC          |     |     |     |     |
| <b><i>fh1:CRISPR</i></b> | 121 | .....                                                                  |     |     |     |     |
| <b>FH1</b>               | 41  | <b>S P P P S P P S P P P L P K L P F S S T</b>                         |     |     |     |     |
| <b>fh1:CRISPR</b>        | 41  | . . . . .                                                              |     |     |     |     |
|                          | 181 | 190                                                                    | 200 | 210 | 220 | 230 |
| <b><i>FH1</i></b>        | 181 | ACTCCTCCATCTTCATCAGACCCAAATGCTTCTCCTTTCTTCCCTTTATACCCTTCATCT           |     |     |     |     |
| <b><i>fh1:CRISPR</i></b> | 181 | .....                                                                  |     |     |     |     |
| <b>FH1</b>               | 61  | <b>T P P S S S D P N A S P F F P L Y P S S</b>                         |     |     |     |     |
| <b>fh1:CRISPR</b>        | 61  | . . . . .                                                              |     |     |     |     |
|                          | 241 | 250                                                                    | 260 | 270 | 280 | 290 |
| <b><i>FH1</i></b>        | 241 | CCACCACCACCTTCTCCAGCCTCCTTCGCTTCTTTTCCGGCGAATATCTCATCTCTAATC           |     |     |     |     |
| <b><i>fh1:CRISPR</i></b> | 241 | .....                                                                  |     |     |     |     |
| <b>FH1</b>               | 81  | <b>P P P P S P A S F A S F P A N I S S L I</b>                         |     |     |     |     |
| <b>fh1:CRISPR</b>        | 81  | . . . . .                                                              |     |     |     |     |
|                          | 301 | 310                                                                    | 320 | 330 | 340 | 350 |
| <b><i>FH1</i></b>        | 301 | GTCCCTCAGCCACTAAATCCCCACCTAACTCCAAAAACTCCTTATCGTCGCTATCTCC             |     |     |     |     |
| <b><i>fh1:CRISPR</i></b> | 301 | .....                                                                  |     |     |     |     |
| <b>FH1</b>               | 101 | <b>V P H A T K S P P N S K K L L I V A I S</b>                         |     |     |     |     |
| <b>fh1:CRISPR</b>        | 101 | . . . . .                                                              |     |     |     |     |
|                          | 361 | 370                                                                    | 380 | 390 | 400 | 410 |
| <b><i>FH1</i></b>        | 361 | GCCGTTTCTCCGCTGCTTTAGTCGCTCTACTTATCGCTTACTCTATTGGCGAAGAAGC             |     |     |     |     |
| <b><i>fh1:CRISPR</i></b> | 361 | .....                                                                  |     |     |     |     |
| <b>FH1</b>               | 121 | <b>A V S S A A L V A L L I A L L Y W R R S</b>                         |     |     |     |     |
| <b>fh1:CRISPR</b>        | 121 | . . . . .                                                              |     |     |     |     |
|                          | 421 | 430                                                                    | 440 | 450 | 460 | 470 |
| <b><i>FH1</i></b>        | 421 | AAACGTAACCAAGATCTTAACTTCTCCGATGATAGCAAACATACACCACCG-ACAGTAG            |     |     |     |     |
| <b><i>fh1:CRISPR</i></b> | 421 | ..... <b>T</b> .....                                                   |     |     |     |     |
| <b>FH1</b>               | 141 | <b>K R N Q D L N F S D D S K T Y T T D S S</b>                         |     |     |     |     |
| <b>fh1:CRISPR</b>        | 141 | . . . . . <b>V Q *</b>                                                 |     |     |     |     |
|                          | 481 | 490                                                                    | 500 | 510 |     |     |
| <b><i>FH1</i></b>        | 480 | CCGCCGTGTCTACCCTCCTCCTCCGGCAACGGCGCC                                   |     |     |     |     |
| <b><i>fh1:CRISPR</i></b> | 481 | .....                                                                  |     |     |     |     |
| <b>FH1</b>               | 161 | <b>R R V Y P P P P A T A ...</b>                                       |     |     |     |     |
| <b>fh1:CRISPR</b>        | 161 | .....                                                                  |     |     |     |     |

Signal peptide  
 Extracytoplasmic  
 Transmembrane
