# Supplementary material for: Division of Labor Between Two Actin Nucleators—the Formin FH1 and the ARP2/3 Complex—in Arabidopsis Epidermal Cell Morphogenesis
Source: PubMed Central journal article supplement (PMC7061858; doi:10.3389/fpls.2020.00148), 2020-03-02

**Supplementary Figure S5.** Actin cytoskeleton organization and dynamics in the adaxial cotyledon epidermis of 5 DAG *wt*, *arp5*, *arp2* or *arp4* seedling expressing FABD-GFP. Quantitative estimates of actin bundling (measured as skewness of fluorescence intensity distribution among labelled structures), actin network density (measured as pixel occupancy of skeletonized meshwork), microfilament structure lifetime (represented by maximum values observed over 120 sec in structures crossing a 20  $\mu\text{m}$  transect) and microfilament structure lateral mobility (represented by maximum trajectories observed over 120 sec in structures crossing a 20  $\mu\text{m}$  transect) are shown. Statistical significance of differences is denoted by asterisks (\* for  $p < 0.05$ , \*\*for  $p < 0.01$ ).

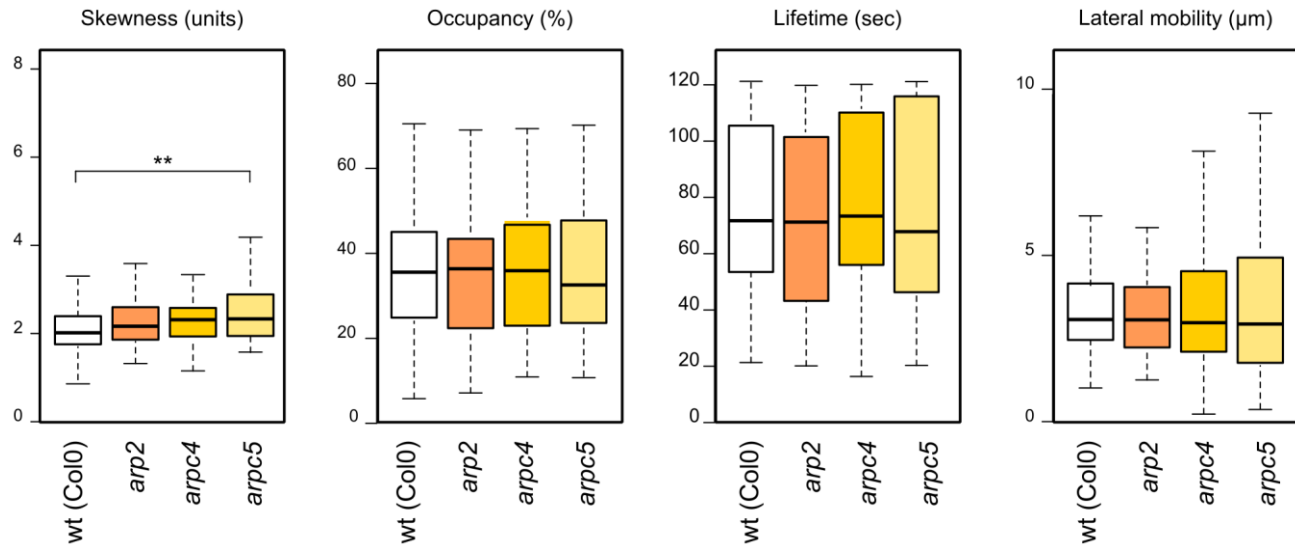

Supplement: DataSheet_5.pdf [file DataSheet_5.pdf]
