# Supplementary material for: Division of Labor Between Two Actin Nucleators—the Formin FH1 and the ARP2/3 Complex—in Arabidopsis Epidermal Cell Morphogenesis
Source: PubMed Central journal article supplement (PMC7061858; doi:10.3389/fpls.2020.00148), 2020-03-02
Supplement: DataSheet_8.pdf [file DataSheet_8.pdf]

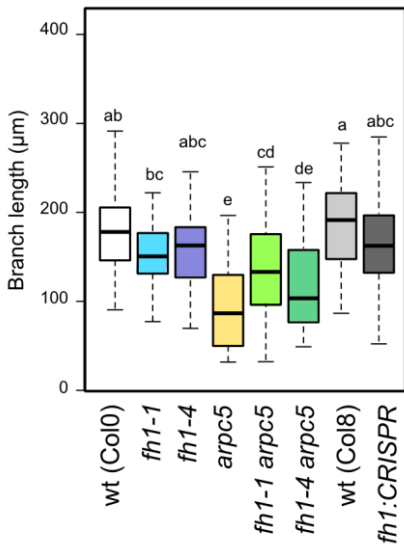

### Supplementary Figure S8.

Length of terminal branches in 4-branched trichomes of wt plants and actin nucleator mutants. Values labelled by the same letters do not differ significantly ( $p < 0.05$ ).
